# Supplementary material for: Preconditioning Methods to Improve Mesenchymal Stromal Cell-Derived Extracellular Vesicles in Bone Regeneration—A Systematic Review
Source: Biology (Basel). 2022 May 11;11(5):733. doi: 10.3390/biology11050733 (PMC9138769; doi:10.3390/biology11050733)
Supplement: Supplementary file 1 [file biology-11-00733-s001.zip › Systematic review Protocol - StArt.pdf]

# StArt - State of the Art through Systematic Review

## Approaches to improve the therapeutic effects of mesenchymal stromal cell-derived extracellular vesicles in bone regeneration – a systematic review

Date: 12/20/2021 - 12:59:27

|                                                   |                                                                                                                                                                                                                                                                                                                                                                                                                                                                                                                                                                                                                                                                                                                                                                                                                                                                                                                                                                                                   |
|---------------------------------------------------|---------------------------------------------------------------------------------------------------------------------------------------------------------------------------------------------------------------------------------------------------------------------------------------------------------------------------------------------------------------------------------------------------------------------------------------------------------------------------------------------------------------------------------------------------------------------------------------------------------------------------------------------------------------------------------------------------------------------------------------------------------------------------------------------------------------------------------------------------------------------------------------------------------------------------------------------------------------------------------------------------|
| <b>Title:</b>                                     | Approaches to improve the therapeutic effects of mesenchymal stromal cell-derived extracellular vesicles in bone regeneration – a systematic review                                                                                                                                                                                                                                                                                                                                                                                                                                                                                                                                                                                                                                                                                                                                                                                                                                               |
| <b>Researchers:</b>                               | Fernanda Campos Hertel                                                                                                                                                                                                                                                                                                                                                                                                                                                                                                                                                                                                                                                                                                                                                                                                                                                                                                                                                                            |
| <b>Objectives:</b>                                | Ponctuate and assess the methodology used to improve the therapeutic abilyties of mesenchymal stromal cells derived extracellular vesicles                                                                                                                                                                                                                                                                                                                                                                                                                                                                                                                                                                                                                                                                                                                                                                                                                                                        |
| <b>Main Question:</b>                             | Does the conditioning of MSCs improve the therapeutic effects of MSC-derived EVs for bone regeneration?                                                                                                                                                                                                                                                                                                                                                                                                                                                                                                                                                                                                                                                                                                                                                                                                                                                                                           |
| <b>Intervention:</b>                              | Treatment with EVs derived from preconditioned MSCs                                                                                                                                                                                                                                                                                                                                                                                                                                                                                                                                                                                                                                                                                                                                                                                                                                                                                                                                               |
| <b>Control:</b>                                   | Treatment withl EVs without conditioning                                                                                                                                                                                                                                                                                                                                                                                                                                                                                                                                                                                                                                                                                                                                                                                                                                                                                                                                                          |
| <b>Population:</b>                                | in vivo or in vitro studies with a focus on osteogenesis/bone regeneration                                                                                                                                                                                                                                                                                                                                                                                                                                                                                                                                                                                                                                                                                                                                                                                                                                                                                                                        |
| <b>Results:</b>                                   | osteogenesis/angiogenesis for in vitro and in vivo studies                                                                                                                                                                                                                                                                                                                                                                                                                                                                                                                                                                                                                                                                                                                                                                                                                                                                                                                                        |
| <b>Keywords:</b>                                  | MSC; bone healing; bone regeneration; bone repair; exosome; extracellular vesicles; fracture; mesenchymal stem cells; mesenchymal stromal cells                                                                                                                                                                                                                                                                                                                                                                                                                                                                                                                                                                                                                                                                                                                                                                                                                                                   |
| <b>Source Selection Criteria:</b>                 | specific database; broad-ranging database;                                                                                                                                                                                                                                                                                                                                                                                                                                                                                                                                                                                                                                                                                                                                                                                                                                                                                                                                                        |
| <b>Studies Languages:</b>                         | English;                                                                                                                                                                                                                                                                                                                                                                                                                                                                                                                                                                                                                                                                                                                                                                                                                                                                                                                                                                                          |
| <b>Source Search Methods:</b>                     | Included in the manuscript apendix                                                                                                                                                                                                                                                                                                                                                                                                                                                                                                                                                                                                                                                                                                                                                                                                                                                                                                                                                                |
| <b>Source Engine:</b>                             | PubMed; Web of Science; Scopus;                                                                                                                                                                                                                                                                                                                                                                                                                                                                                                                                                                                                                                                                                                                                                                                                                                                                                                                                                                   |
| <b>Studies inclusion and exclusion criterias:</b> | (E) articles that reported the use of EVs from other cells sources than MSCs; (E) articles that reported the use of an animal model with induced disease (as osteoporosis, obesity, femoral head necrosis, periodontal related diseases); (E) articles that did not use EVs as treatment; (E) treatment associating MSCs with EVs; (E) articles that did not report a control group of EVs; (E) articles that did not report conditioning of MSCs; (E) review articles, conference abstracts;<br>(I) articles that reported the treatment with pre-conditioned MSC-derived EVs in vitro and/or in vivo;<br>(I) ; articles that reported the assessment of osteogenesis in vitro and/or in vivo;                                                                                                                                                                                                                                                                                                   |
| <b>Studies types definition:</b>                  | All types, if the inclusion criteria was met.;                                                                                                                                                                                                                                                                                                                                                                                                                                                                                                                                                                                                                                                                                                                                                                                                                                                                                                                                                    |
| <b>Initial studies selection:</b>                 | Based on title and abstract;                                                                                                                                                                                                                                                                                                                                                                                                                                                                                                                                                                                                                                                                                                                                                                                                                                                                                                                                                                      |
| <b>Information Extraction Fields:</b>             | Journal; Country; year of publication;<br>Type of MSC; Species of MSC;<br>Type of vesicle={exosome,extracellular vesicle,microvesicles};<br>Type of conditioning method?; Scaffold? ={yes,no}; Type of scaffold;<br>Isolation method; Characterization methods; Type of study=[in vitro,in vivo]; In vitro: celular type for in vitro analysis; In vitro assays; Animal model; in vivo: type of defect; treatment groups for in vivo analysis;<br>Extracellular vesicles concentration; vehicle for in vivo application; in vivo delivery route;<br>application frequency; time of euthanasia; Types of in vivo analysis; in vitro outcome: uptake; in vitro outcome: proliferation assay; in vitro outcome: osteogenic differentiation; in vitro outcome: scratch wound assay; in vitro outcome: osteogenic markers; in vitro outcome: miRNAs exosomal; in vivo outcome: microct; in vivo outcome: x-ray; in vivo outcome: histology; in vivo outcome: IHC; in vivo outcome: immunofluorescence; |
| <b>Results Summarization:</b>                     | Descriptive, tables and figures;                                                                                                                                                                                                                                                                                                                                                                                                                                                                                                                                                                                                                                                                                                                                                                                                                                                                                                                                                                  |
