# Supplementary material for: Preconditioning Methods to Improve Mesenchymal Stromal Cell-Derived Extracellular Vesicles in Bone Regeneration—A Systematic Review
Source: Biology (Basel). 2022 May 11;11(5):733. doi: 10.3390/biology11050733 (PMC9138769; doi:10.3390/biology11050733)
Supplement: Supplementary file 1 [file biology-11-00733-s001.zip › Table S1.pdf]

Table S1. Studies identification.

| Year | Title                                                                                                                                                                          | Journal                                                 | Country               | Author |
|------|--------------------------------------------------------------------------------------------------------------------------------------------------------------------------------|---------------------------------------------------------|-----------------------|--------|
| 2016 | Hijacking the cellular mail: exosome mediated differentiation of mesenchymal stem cells                                                                                        | Stem Cells International                                | USA                   | [37]   |
| 2017 | Exosomes secreted from mutant-HIF-1 $\alpha$ -modified bone-marrow-derived mesenchymal stem cells attenuate early steroid-induced avascular necrosis of femoral head in rabbit | Cell Biology International                              | China                 | [28]   |
| 2018 | Tissue-engineered bone immobilized with human adipose stem cells-derived exosomes promotes bone regeneration                                                                   | ACS Applied Materials & Interfaces                      | China/The Netherlands | [29]   |
| 2018 | Mesenchymal stem cell-derived exosomes have altered microRNA profiles and induce osteogenic differentiation depending on the stage of differentiation                          | Plos One                                                | Sweden                | [36]   |
| 2018 | Dexamethasone-Activated MSCs Release MVs for Stimulating Osteogenic Response                                                                                                   | Stem Cells International                                | China                 | [30]   |
| 2019 | Exosomes derived from miR-375-overexpressing human adipose mesenchymal stem cells promote bone regeneration                                                                    | Cell Proliferation                                      | China                 | [38]   |
| 2019 | Dimethyloxaloylglycine-stimulated human bone marrow mesenchymal stem cell-derived exosomes enhance bone regeneration through angiogenesis by targeting the AKT/mTOR pathway    | Stem Cell Research and Therapy                          | China                 | [20]   |
| 2019 | Immunoregulatory role of exosomes derived from differentiating mesenchymal stromal cells on inflammation and osteogenesis                                                      | Journal of Tissue Engineering and Regenerative Medicine | Australia/China       | [35]   |
| 2019 | Promoting osteogenic differentiation of human adipose-derived stem cells by altering the expression of exosomal miRNA                                                          | Stem Cells International                                | China                 | [34]   |
| 2020 | Functionally engineered extracellular vesicles improve bone regeneration                                                                                                       | Acta Biomaterialia                                      | USA                   | [21]   |
| 2020 | Human periodontal ligament stem cell-derived exosomes promote bone regeneration by altering microRNA profiles                                                                  | Stem Cells International                                | China                 | [33]   |

|      |                                                                                                                                                               |                                               |                |      |
|------|---------------------------------------------------------------------------------------------------------------------------------------------------------------|-----------------------------------------------|----------------|------|
| 2020 | Hypoxic mesenchymal stem cell-derived exosomes promote bone fracture healing by the transfer of miR-126                                                       | Acta Biomaterialia                            | China          | [17] |
| 2020 | Comparison study of stem cell-derived extracellular vesicles for enhanced osteogenic differentiation                                                          | Tissue Engineering: Part A                    | USA/Iran       | [32] |
| 2020 | Exosomal circPAP1 promoted osteogenic differentiation of homotypic dental pulp stem cells by competitively binding to hsa-miR-31                              | BioMed Research International                 | China/Thailand | [31] |
| 2020 | BMSC-exosomes carry mutant HIF-1a for improving angiogenesis and osteogenesis in critical-sized calvarial defects                                             | Frontiers in Bioengineering and Biotechnology | China          | [18] |
| 2020 | Three-dimensional mechanical microenvironment enhanced osteogenic activity of mesenchymal stem cells-derived exosomes                                         | Chemical Engineering Journal                  | China          | [39] |
| 2020 | Human mesenchymal stem cell-derived exosomes enhance cell-free bone regeneration by altering their miRNAs profiles                                            | Advanced Science                              | USA/China      | [40] |
| 2021 | Bone marrow stromal cells stimulated by strontium-substituted calcium silicate ceramics: release of exosomal miR-146a regulates osteogenesis and angiogenesis | Acta Biomaterialia                            | China          | [41] |

USA, United States of America; HIF, hypoxia-inducible factor; MSCs, mesenchymal stem cells; miRNA, microRNA; BMSC, bone marrow mesenchymal stem cells.
